# Supplementary material for: Facile solvothermal synthesis of 3D flowerlike β-In2S3 microspheres and their photocatalytic activity performance
Source: Royal Society of Chemistry journal article supplement (doi:10.1039/c4ra08545k), 2014-01-01
Supplement: c4ra08545k1.pdf [file c4ra08545k1.pdf]

## Supporting Information

### **Facile solvothermal synthesis of 3D flowerlike $\beta$ - $\text{In}_2\text{S}_3$ microspheres and their photocatalytic activity performance**

*Caiying Wei,<sup>a,b</sup> Wei Guo,<sup>a,b</sup> Jiaqin Yang,<sup>a,b</sup> Hongmin Fan,<sup>a,b</sup> Jing Zhang<sup>a,b</sup> and Wenjun Zheng\*<sup>a,b</sup>*

<sup>a</sup>Department of Materials Chemistry, Key Laboratory of Advanced Energy Materials Chemistry (MOE), TKL of Metal and Molecule-based Material Chemistry, College of Chemistry Nankai University, Tianjin, 300071, P. R. China.

<sup>b</sup>Collaborative Innovation Center of Chemical Science and Engineering (Tianjin), Tianjin 300072, P. R. China.

E-mail: zhwj@nankai.edu.cn

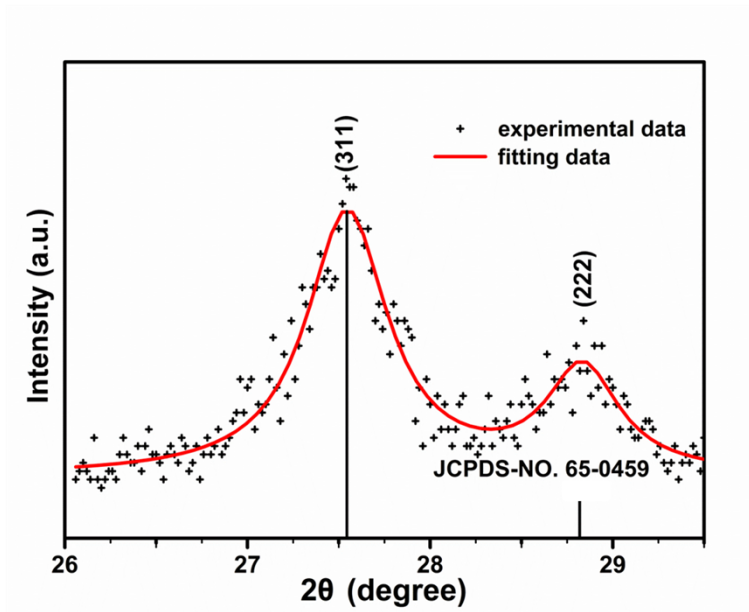

**Figure S1** Fitting curve (26° to 29.5° in 2θ) of as-prepared 3D flowerlike In<sub>2</sub>S<sub>3</sub> microspheres obtained in ethanol-water system with the volume ratio of 1:1 for 24 h.

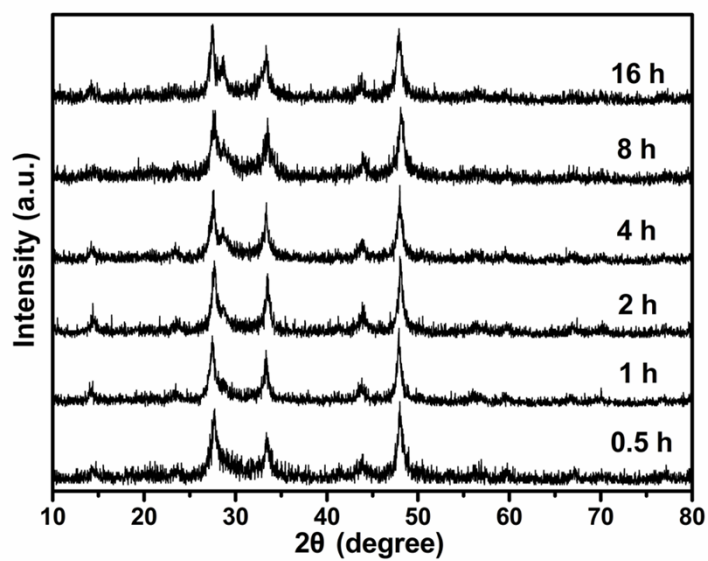

**Figure S2** XRD patterns of In<sub>2</sub>S<sub>3</sub> nanocrystals synthesized at different reaction durations in ethanol-water system with the volume ratio of 1:1.

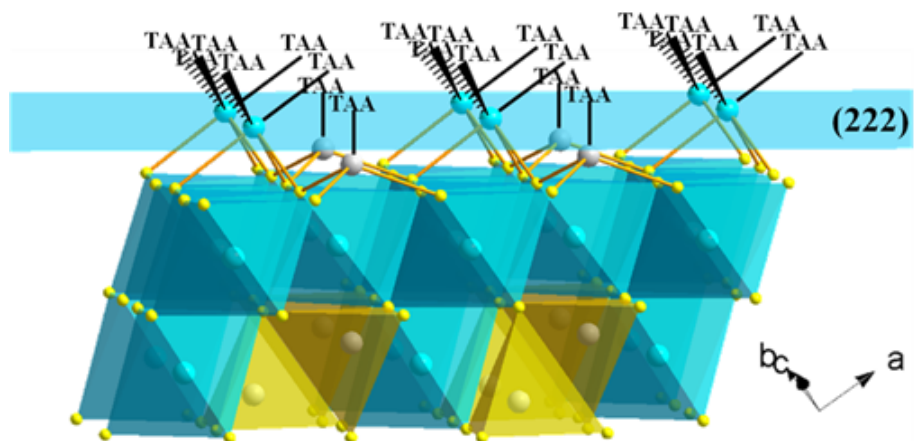

**Figure S3** Schematic diagram of a projected view as TAA absorbed on the (222) surface of  $\text{In}_2\text{S}_3$  to form a layer (●S, ●four-coordinated In and ●six-coordinated In).

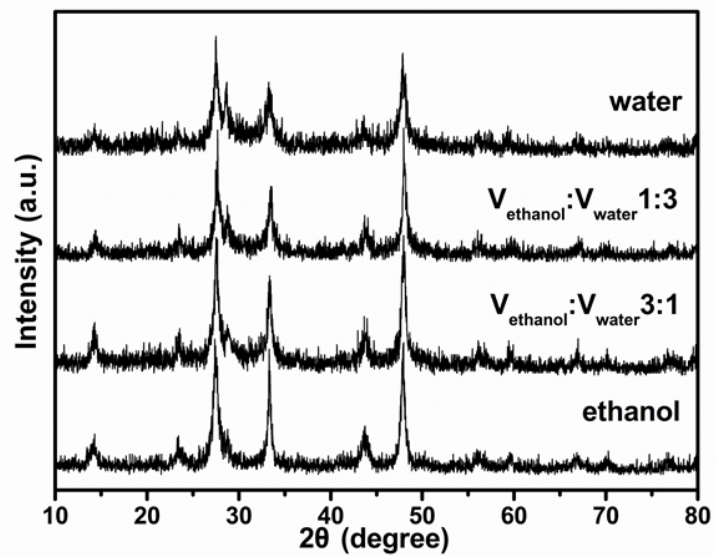

**Figure S4** XRD patterns of products obtained in ethanol-water system with the volume ratio of 1:0, 3:1, 1:3 and 0:1, respectively.

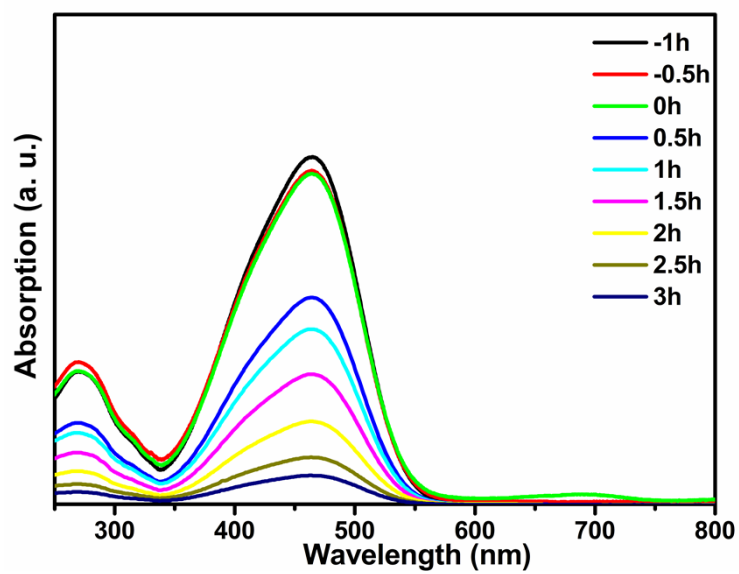

**Figure S5** Time-dependent UV-vis absorption spectra using as-prepared 3D flowerlike  $\text{In}_2\text{S}_3$  microspheres as photocatalyst.
